# Supplementary material for: Recommendations and evidence for reporting items in pediatric clinical trial protocols and reports: two systematic reviews
Source: Springer Nature journal article supplement (doi:10.1186/s13063-015-0954-0), 2015-09-18
Supplement: MOESM1 [file 9782536]

**SPIRIT-C search strategy for Ovid MEDLINE® (including in-process & other non-indexed citations) 1946 to July 7 2014**

1. research design/ or clinical trial as topic/st, mt or biomedical research/ or writing/ or publishing/st or clinical protocols/st, mt or evidence-based practice/st or peer review, research/mt, st or documentation/mt, st
2. (child\$ or paediatric\$ or pediatric\$ or infan\$ or young\$ or toddler or bab\$ or preschool\$ or pre-school or adolesc\$ or teenage\$ or youth\$ or neonat\$).mp.
3. (protocol\$ or design\$).ti,ab,mt.
4. "Standard Protocol Items: Recommendations for Interventional Trials".tw.
5. (report\$ or guideline\$ or checklist\$ or recommend\$ or standard\$ or require\$ or instruct\$ or guidance\$ or consensus or aide memoir\$ or writ\$).tw.
6. animal/ not human/
7. (1 and 2 and 3 and 5) or 4
8. 7 not 6
9. limit 8 to english language
