# Supplementary material for: Recommendations and evidence for reporting items in pediatric clinical trial protocols and reports: two systematic reviews
Source: Springer Nature journal article supplement (doi:10.1186/s13063-015-0954-0), 2015-09-18
Supplement: MOESM2 [file 9782536]

**CONSORT-C search strategy for Ovid MEDLINE® (including in-process & other non-indexed citations)  
1946 to May 16 2014**

1. clinical trial/ or clinical trial, phase i/ or clinical trial, phase ii/ or clinical trial, phase iii/ or clinical trial, phase iv/ or controlled clinical trial/ or multicenter study/ or randomized controlled trial/ or pragmatic clinical trial/ or clinical trials as topic/ or clinical trials, phase i as topic/ or clinical trials, phase ii as topic/ or clinical trials, phase iii as topic/ or clinical trials, phase iv as topic/ or controlled clinical trials as topic/ or randomized controlled trials as topic/
2. research design/ or biomedical research/ or writing/ or publishing/ or evidence-based practice/st or peer review, research/mt, st or documentation/mt, st
3. Publishing/
4. (report\$ or guideline\$ or checklist\$ or recommend\$ or standard\$ or require\$ or instruct\$ or guidance\$ or consensus or aide memoir\$ or writ\$ or consort).tw.
5. (manuscript? adj3 (submit\$ or submission? or writing or quality or write? or written)).tw.
6. 1 and 2 and (3 or 4 or 5)
7. (child\$ or paediatric\$ or pediatric\$ or infan\$ or young\$ or toddler or bab\$ or preschool\$ or pre-school or adolesc\$ or teenage\$ or youth\$ or neonat\$).mp.
8. 6 and 7
9. animal/ not human/
10. 8 not 9
