# Supplementary material for: Recommendations and evidence for reporting items in pediatric clinical trial protocols and reports: two systematic reviews
Source: Springer Nature journal article supplement (doi:10.1186/s13063-015-0954-0), 2015-09-18
Supplement: MOESM3 [file 9782536]

## SPIRIT-C data extraction form

| Item                                                                               | Description                                                                                                                                                                                                                                         |
|------------------------------------------------------------------------------------|-----------------------------------------------------------------------------------------------------------------------------------------------------------------------------------------------------------------------------------------------------|
| Record ID                                                                          |                                                                                                                                                                                                                                                     |
| First Author                                                                       | <i>Last Name, First Initial (e.g. Smith, J)</i>                                                                                                                                                                                                     |
| Year                                                                               |                                                                                                                                                                                                                                                     |
| Title                                                                              |                                                                                                                                                                                                                                                     |
| Journal                                                                            | <i>Full title of journal</i>                                                                                                                                                                                                                        |
| <u>Study Information</u>                                                           |                                                                                                                                                                                                                                                     |
| Study Type                                                                         | 1 = clinical trial<br>2 = systematic review<br>3 = meta analysis<br>4 = commentary/review<br>5 = cohort/cross sectional<br>6 = protocol<br>7 = other                                                                                                |
| Country                                                                            |                                                                                                                                                                                                                                                     |
| Target Population                                                                  | 1 = adult<br>2 = paediatric<br>3 = all<br>4 = N/A                                                                                                                                                                                                   |
| Trial Design                                                                       | <i>If it's a CT</i><br>1 = RCT<br>2 = Cluster<br>3 = Other                                                                                                                                                                                          |
| Area of study                                                                      | <i>e.g. Rheumatology</i>                                                                                                                                                                                                                            |
| <u>Guideline Details</u>                                                           |                                                                                                                                                                                                                                                     |
| Does this paper describe a protocol guideline/recommendations for trials?          | 0 = No<br>1 = Yes<br>2 = Don't know<br>6 = N/A                                                                                                                                                                                                      |
| If the question above is yes: What study design are these guidelines intended for? | 1 = clinical trial<br>2 = systematic review<br>3 = meta analysis<br>4 = commentary/review<br>5 = cohort/cross sectional<br>6 = protocol<br>7 = other<br><br><i>NOTE: If there is more than one applicable, separate each number with ",[space]"</i> |
| Is evidence provided to support these guidelines/suggestions?                      | 0 = No<br>1 = Yes<br>2 = Don't know<br>6 = N/A                                                                                                                                                                                                      |
| If yes, how was this evidence achieved?                                            | 1 = Literature Review<br>2 = Systematic REview<br>3 = Clinical Trial<br>4 = Consensus<br>5 = Expert opinion<br>6 = N/A                                                                                                                              |
|                                                                                    |                                                                                                                                                                                                                                                     |
|                                                                                    |                                                                                                                                                                                                                                                     |

|                                                                                                                                                                                                                                                                                             |                                                            |
|---------------------------------------------------------------------------------------------------------------------------------------------------------------------------------------------------------------------------------------------------------------------------------------------|------------------------------------------------------------|
| <u>SPIRIT Statement Evidence</u>                                                                                                                                                                                                                                                            |                                                            |
| <u>Administrative information</u>                                                                                                                                                                                                                                                           |                                                            |
| <i>Title</i>                                                                                                                                                                                                                                                                                |                                                            |
| 1 Descriptive title identifying the study design, population, interventions, and, if applicable, trial acronym                                                                                                                                                                              | 0 = No<br>1 = Yes<br>2 = Don't know<br>6 = N/A<br>Evidence |
| <i>Trial registration</i>                                                                                                                                                                                                                                                                   |                                                            |
| 2a Trial identifier and registry name. If not yet registered, name of intended registry                                                                                                                                                                                                     | 0 = No<br>1 = Yes<br>2 = Don't know<br>6 = N/A<br>Evidence |
| 2b All items from the World Health Organization Trial Registration Data Set (Appendix Table, available at <a href="http://www.annals.org">www.annals.org</a> )                                                                                                                              | 0 = No<br>1 = Yes<br>2 = Don't know<br>6 = N/A<br>Evidence |
| <i>Protocol version</i>                                                                                                                                                                                                                                                                     |                                                            |
| 3 Date and version identifier                                                                                                                                                                                                                                                               | 0 = No<br>1 = Yes<br>2 = Don't know<br>6 = N/A<br>Evidence |
| <i>Funding</i>                                                                                                                                                                                                                                                                              |                                                            |
| 4 Sources and types of financial, material, and other support                                                                                                                                                                                                                               | 0 = No<br>1 = Yes<br>2 = Don't know<br>6 = N/A<br>Evidence |
| <i>Roles and responsibilities</i>                                                                                                                                                                                                                                                           |                                                            |
| 5a Names, affiliations, and roles of protocol contributors                                                                                                                                                                                                                                  | 0 = No<br>1 = Yes<br>2 = Don't know<br>6 = N/A<br>Evidence |
| 5b Name and contact information for the trial sponsor                                                                                                                                                                                                                                       | 0 = No<br>1 = Yes<br>2 = Don't know<br>6 = N/A<br>Evidence |
| 5c Role of study sponsor and funders, if any, in study design; collection, management, analysis, and interpretation of data; writing of the report; and the decision to submit the report for publication, including whether they will have ultimate authority over any of these activities | 0 = No<br>1 = Yes<br>2 = Don't know<br>6 = N/A<br>Evidence |
| 5d Composition, roles, and responsibilities of the coordinating center, steering committee, end point adjudication committee, data management team, and other individuals or groups overseeing the trial, if applicable (see item 21a for DMC)                                              | 0 = No<br>1 = Yes<br>2 = Don't know<br>6 = N/A<br>Evidence |
| <u>Introduction</u>                                                                                                                                                                                                                                                                         |                                                            |

|                                                                                                                                                                                                                  |                                                            |
|------------------------------------------------------------------------------------------------------------------------------------------------------------------------------------------------------------------|------------------------------------------------------------|
| <i>Background and rationale</i>                                                                                                                                                                                  |                                                            |
| 6a Description of research question and justification for undertaking the trial, including summary of relevant studies (published and unpublished) examining benefits and harms for each intervention            | 0 = No<br>1 = Yes<br>2 = Don't know<br>6 = N/A<br>Evidence |
| 6b Explanation for choice of comparators                                                                                                                                                                         | 0 = No<br>1 = Yes<br>2 = Don't know<br>6 = N/A<br>Evidence |
| <i>Objectives</i>                                                                                                                                                                                                |                                                            |
| 7 Specific objectives or hypotheses                                                                                                                                                                              | 0 = No<br>1 = Yes<br>2 = Don't know<br>6 = N/A<br>Evidence |
| <i>Trial design</i>                                                                                                                                                                                              |                                                            |
| 8 Description of trial design, including type of trial (e.g., parallel group, crossover, factorial, single group), allocation ratio, and framework (e.g., superiority, equivalence, noninferiority, exploratory) | 0 = No<br>1 = Yes<br>2 = Don't know<br>6 = N/A<br>Evidence |
| <i>Methods</i>                                                                                                                                                                                                   |                                                            |
| <i>Participants, interventions, and outcomes</i>                                                                                                                                                                 |                                                            |
| <i>Study setting</i>                                                                                                                                                                                             |                                                            |
| 9 Description of study settings (e.g., community clinic, academic hospital) and list of countries where data will be collected. Reference to where list of study sites can be obtained                           | 0 = No<br>1 = Yes<br>2 = Don't know<br>6 = N/A<br>Evidence |
| <i>Eligibility criteria</i>                                                                                                                                                                                      |                                                            |
| 10 Inclusion and exclusion criteria for participants. If applicable, eligibility criteria for study centers and individuals who will perform the interventions (e.g., surgeons, psychotherapists)                | 0 = No<br>1 = Yes<br>2 = Don't know<br>6 = N/A<br>Evidence |
| <i>Interventions</i>                                                                                                                                                                                             |                                                            |
| 11a Interventions for each group with sufficient detail to allow replication, including how and when they will be administered                                                                                   | 0 = No<br>1 = Yes<br>2 = Don't know<br>6 = N/A<br>Evidence |
| 11b Criteria for discontinuing or modifying allocated interventions for a given trial participant (e.g., drug dose change in response to harms, participant request, or improving/worsening disease)             | 0 = No<br>1 = Yes<br>2 = Don't know<br>6 = N/A<br>Evidence |
| 11c Strategies to improve adherence to intervention protocols, and any procedures for monitoring adherence (e.g., drug tablet return, laboratory tests)                                                          | 0 = No<br>1 = Yes<br>2 = Don't know<br>6 = N/A<br>Evidence |

|                                                                                                                                                                                                                                                                                                                                                                                         |                                                                          |
|-----------------------------------------------------------------------------------------------------------------------------------------------------------------------------------------------------------------------------------------------------------------------------------------------------------------------------------------------------------------------------------------|--------------------------------------------------------------------------|
| 11d Relevant concomitant care and interventions that are permitted or prohibited during the trial                                                                                                                                                                                                                                                                                       | <p>0 = No<br/>1 = Yes<br/>2 = Don't know<br/>6 = N/A</p> <p>Evidence</p> |
| <i>Outcomes</i>                                                                                                                                                                                                                                                                                                                                                                         |                                                                          |
| 12 Primary, secondary, and other outcomes, including the specific measurement variable (e.g., systolic blood pressure), analysis metric (e.g., change from baseline, final value, time to event), method of aggregation (e.g., median, proportion), and time point for each outcome. Explanation of the clinical relevance of chosen efficacy and harm outcomes is strongly recommended | <p>0 = No<br/>1 = Yes<br/>2 = Don't know<br/>6 = N/A</p> <p>Evidence</p> |
| <i>Participant timeline</i>                                                                                                                                                                                                                                                                                                                                                             |                                                                          |
| 13 Time schedule of enrollment, interventions (including any run-ins and washouts), assessments, and visits for participants. A schematic diagram is highly recommended                                                                                                                                                                                                                 | <p>0 = No<br/>1 = Yes<br/>2 = Don't know<br/>6 = N/A</p> <p>Evidence</p> |
| <i>Sample size</i>                                                                                                                                                                                                                                                                                                                                                                      |                                                                          |
| 14 Estimated number of participants needed to achieve study objectives and how it was determined, including clinical and statistical assumptions supporting any sample size calculations                                                                                                                                                                                                | <p>0 = No<br/>1 = Yes<br/>2 = Don't know<br/>6 = N/A</p> <p>Evidence</p> |
| <i>Recruitment</i>                                                                                                                                                                                                                                                                                                                                                                      |                                                                          |
| 15 Strategies for achieving adequate participant enrollment to reach target sample size                                                                                                                                                                                                                                                                                                 | <p>0 = No<br/>1 = Yes<br/>2 = Don't know<br/>6 = N/A</p> <p>Evidence</p> |
| <i>Assignment of interventions (for controlled trials): Allocation</i>                                                                                                                                                                                                                                                                                                                  |                                                                          |
| <i>Sequence generation</i>                                                                                                                                                                                                                                                                                                                                                              |                                                                          |
| 16a Method of generating the allocation sequence (e.g., computer-generated random numbers), and list of any factors for stratification. To reduce predictability of a random sequence, details of any planned restriction (e.g., blocking) should be provided in a separate document that is unavailable to those who enroll participants or assign interventions.                      | <p>0 = No<br/>1 = Yes<br/>2 = Don't know<br/>6 = N/A</p> <p>Evidence</p> |
| <i>Allocation concealment mechanism</i>                                                                                                                                                                                                                                                                                                                                                 |                                                                          |
| 16b Mechanism of implementing the allocation sequence (e.g., central telephone; sequentially numbered, opaque, sealed envelopes), describing any steps to conceal the sequence until interventions are assigned                                                                                                                                                                         | <p>0 = No<br/>1 = Yes<br/>2 = Don't know<br/>6 = N/A</p> <p>Evidence</p> |
| <i>Implementation</i>                                                                                                                                                                                                                                                                                                                                                                   |                                                                          |
| 16c Who will generate the allocation sequence, who will enroll participants, and who will assign participants to interventions                                                                                                                                                                                                                                                          | <p>0 = No<br/>1 = Yes<br/>2 = Don't know<br/>6 = N/A</p> <p>Evidence</p> |
| <i>Blinding (masking)</i>                                                                                                                                                                                                                                                                                                                                                               |                                                                          |
| 17a Who will be blinded after assignment to interventions (e.g., trial participants, care providers, outcome assessors, data analysts), and how                                                                                                                                                                                                                                         | <p>0 = No<br/>1 = Yes<br/>2 = Don't know<br/>6 = N/A</p>                 |

|                                                                                                                                                                                                                                                                                                                                                                                                                       |                                                |
|-----------------------------------------------------------------------------------------------------------------------------------------------------------------------------------------------------------------------------------------------------------------------------------------------------------------------------------------------------------------------------------------------------------------------|------------------------------------------------|
|                                                                                                                                                                                                                                                                                                                                                                                                                       | <i>Evidence</i>                                |
| 17b If blinded, circumstances under which unblinding is permissible, and procedure for revealing a participant's allocated intervention during the trial                                                                                                                                                                                                                                                              | 0 = No<br>1 = Yes<br>2 = Don't know<br>6 = N/A |
|                                                                                                                                                                                                                                                                                                                                                                                                                       | <i>Evidence</i>                                |
| <i>Data collection, management, and analysis</i>                                                                                                                                                                                                                                                                                                                                                                      |                                                |
| <i>Data collection methods</i>                                                                                                                                                                                                                                                                                                                                                                                        |                                                |
| 18a Plans for assessment and collection of outcome, baseline, and other trial data, including any related processes to promote data quality (e.g., duplicate measurements, training of assessors) and a description of study instruments (e.g., questionnaires, laboratory tests) along with their reliability and validity, if known. Reference to where data collection forms can be found, if not in the protocol. | 0 = No<br>1 = Yes<br>2 = Don't know<br>6 = N/A |
|                                                                                                                                                                                                                                                                                                                                                                                                                       | <i>Evidence</i>                                |
| 18b Plans to promote participant retention and complete follow-up, including list of any outcome data to be collected for participants who discontinue or deviate from intervention protocols                                                                                                                                                                                                                         | 0 = No<br>1 = Yes<br>2 = Don't know<br>6 = N/A |
|                                                                                                                                                                                                                                                                                                                                                                                                                       | <i>Evidence</i>                                |
| <i>Data management</i>                                                                                                                                                                                                                                                                                                                                                                                                |                                                |
| 19 Plans for data entry, coding, security, and storage, including any related processes to promote data quality (e.g., double data entry; range checks for data values). Reference to where details of data management procedures can be found, if not in the protocol.                                                                                                                                               | 0 = No<br>1 = Yes<br>2 = Don't know<br>6 = N/A |
|                                                                                                                                                                                                                                                                                                                                                                                                                       | <i>Evidence</i>                                |
| <i>Statistical methods</i>                                                                                                                                                                                                                                                                                                                                                                                            |                                                |
| 20a Statistical methods for analyzing primary and secondary outcomes. Reference to where other details of the statistical analysis plan can be found, if not in the protocol.                                                                                                                                                                                                                                         | 0 = No<br>1 = Yes<br>2 = Don't know<br>6 = N/A |
|                                                                                                                                                                                                                                                                                                                                                                                                                       | <i>Evidence</i>                                |
| 20b Methods for any additional analyses (e.g., subgroup and adjusted analyses)                                                                                                                                                                                                                                                                                                                                        | 0 = No<br>1 = Yes<br>2 = Don't know<br>6 = N/A |
|                                                                                                                                                                                                                                                                                                                                                                                                                       | <i>Evidence</i>                                |
| 20c Definition of analysis population relating to protocol nonadherence (e.g., as-randomized analysis), and any statistical methods to handle missing data (e.g., multiple imputation)                                                                                                                                                                                                                                | 0 = No<br>1 = Yes<br>2 = Don't know<br>6 = N/A |
|                                                                                                                                                                                                                                                                                                                                                                                                                       | <i>Evidence</i>                                |
| <i>Monitoring</i>                                                                                                                                                                                                                                                                                                                                                                                                     |                                                |
| <i>Data monitoring</i>                                                                                                                                                                                                                                                                                                                                                                                                |                                                |
| 21a Composition of DMC; summary of its role and reporting structure; statement of whether it is independent from the sponsor and competing interests; and reference to where further details about its charter can be found, if not in the protocol. Alternatively, an explanation of why a DMC is not needed.                                                                                                        | 0 = No<br>1 = Yes<br>2 = Don't know<br>6 = N/A |
|                                                                                                                                                                                                                                                                                                                                                                                                                       | <i>Evidence</i>                                |

|                                                                                                                                                                                                                                          |                                                |
|------------------------------------------------------------------------------------------------------------------------------------------------------------------------------------------------------------------------------------------|------------------------------------------------|
| 21b Description of any interim analyses and stopping guidelines, including who will have access to these interim results and make the final decision to terminate the trial                                                              | 0 = No<br>1 = Yes<br>2 = Don't know<br>6 = N/A |
|                                                                                                                                                                                                                                          | Evidence                                       |
| <i>Harms</i>                                                                                                                                                                                                                             |                                                |
| 22 Plans for collecting, assessing, reporting, and managing solicited and spontaneously reported adverse events and other unintended effects of trial interventions or trial conduct                                                     | 0 = No<br>1 = Yes<br>2 = Don't know<br>6 = N/A |
|                                                                                                                                                                                                                                          | Evidence                                       |
| <i>Auditing</i>                                                                                                                                                                                                                          |                                                |
| 23 Frequency and procedures for auditing trial conduct, if any, and whether the process will be independent from investigators and the sponsor                                                                                           | 0 = No<br>1 = Yes<br>2 = Don't know<br>6 = N/A |
|                                                                                                                                                                                                                                          | Evidence                                       |
| <u>Ethics and dissemination</u>                                                                                                                                                                                                          |                                                |
| <i>Research ethics approval</i>                                                                                                                                                                                                          |                                                |
| 24 Plans for seeking REC/IRB approval                                                                                                                                                                                                    | 0 = No<br>1 = Yes<br>2 = Don't know<br>6 = N/A |
|                                                                                                                                                                                                                                          | Evidence                                       |
| <i>Protocol amendments</i>                                                                                                                                                                                                               |                                                |
| 25 Plans for communicating important protocol modifications (e.g., changes to eligibility criteria, outcomes, analyses) to relevant parties (e.g., investigators, RECs/IRBs, trial participants, trial registries, journals, regulators) | 0 = No<br>1 = Yes<br>2 = Don't know<br>6 = N/A |
|                                                                                                                                                                                                                                          | Evidence                                       |
| <i>Consent or assent</i>                                                                                                                                                                                                                 |                                                |
| 26a Who will obtain informed consent or assent from potential trial participants or authorized surrogates, and how (see item 32)                                                                                                         | 0 = No<br>1 = Yes<br>2 = Don't know<br>6 = N/A |
|                                                                                                                                                                                                                                          | Evidence                                       |
| 26b Additional consent provisions for collection and use of participant data and biological specimens in ancillary studies, if applicable                                                                                                | 0 = No<br>1 = Yes<br>2 = Don't know<br>6 = N/A |
|                                                                                                                                                                                                                                          | Evidence                                       |
| <i>Confidentiality</i>                                                                                                                                                                                                                   |                                                |
| 27 How personal information about potential and enrolled participants will be collected, shared, and maintained in order to protect confidentiality before, during, and after the trial                                                  | 0 = No<br>1 = Yes<br>2 = Don't know<br>6 = N/A |
|                                                                                                                                                                                                                                          | Evidence                                       |
| <i>Declaration of interests</i>                                                                                                                                                                                                          |                                                |
| 28 Financial and other competing interests for principal investigators for the overall trial and each study site                                                                                                                         | 0 = No<br>1 = Yes<br>2 = Don't know<br>6 = N/A |
|                                                                                                                                                                                                                                          | Evidence                                       |

|                                                                                                                                                                                                                                                                                            |                                                |
|--------------------------------------------------------------------------------------------------------------------------------------------------------------------------------------------------------------------------------------------------------------------------------------------|------------------------------------------------|
| <i>Access to data</i>                                                                                                                                                                                                                                                                      |                                                |
| 29 Statement of who will have access to the final trial data set, and disclosure of contractual agreements that limit such access for investigators                                                                                                                                        | 0 = No<br>1 = Yes<br>2 = Don't know<br>6 = N/A |
|                                                                                                                                                                                                                                                                                            | <i>Evidence</i>                                |
| <i>Ancillary and post-trial care</i>                                                                                                                                                                                                                                                       |                                                |
| 30 Provisions, if any, for ancillary and post-trial care, and for compensation to those who suffer harm from trial participation                                                                                                                                                           | 0 = No<br>1 = Yes<br>2 = Don't know<br>6 = N/A |
|                                                                                                                                                                                                                                                                                            | <i>Evidence</i>                                |
| <i>Dissemination policy</i>                                                                                                                                                                                                                                                                |                                                |
| 31a Plans for investigators and sponsor to communicate trial results to participants, health care professionals, the public, and other relevant groups (e.g., via publication, reporting in results databases, or other data-sharing arrangements), including any publication restrictions | 0 = No<br>1 = Yes<br>2 = Don't know<br>6 = N/A |
|                                                                                                                                                                                                                                                                                            | <i>Evidence</i>                                |
| 31b Authorship eligibility guidelines and any intended use of professional writers                                                                                                                                                                                                         | 0 = No<br>1 = Yes<br>2 = Don't know<br>6 = N/A |
|                                                                                                                                                                                                                                                                                            | <i>Evidence</i>                                |
| 31c Plans, if any, for granting public access to the full protocol, participant-level data set, and statistical code                                                                                                                                                                       | 0 = No<br>1 = Yes<br>2 = Don't know<br>6 = N/A |
|                                                                                                                                                                                                                                                                                            | <i>Evidence</i>                                |
| <u>Appendices</u>                                                                                                                                                                                                                                                                          |                                                |
| <i>Informed consent materials</i>                                                                                                                                                                                                                                                          |                                                |
| 32 Model consent form and other related documentation given to participants and authorized surrogates                                                                                                                                                                                      | 0 = No<br>1 = Yes<br>2 = Don't know<br>6 = N/A |
|                                                                                                                                                                                                                                                                                            | <i>Evidence</i>                                |
| <i>Biological specimens</i>                                                                                                                                                                                                                                                                |                                                |
| 33 Plans for collection, laboratory evaluation, and storage of biological specimens for genetic or molecular analysis in the current trial and for future use in ancillary studies, if applicable                                                                                          | 0 = No<br>1 = Yes<br>2 = Don't know<br>6 = N/A |
|                                                                                                                                                                                                                                                                                            | <i>Evidence</i>                                |
| SPIRIT-C Evidence                                                                                                                                                                                                                                                                          |                                                |
| <u>Administration information</u>                                                                                                                                                                                                                                                          |                                                |
| <i>Title</i>                                                                                                                                                                                                                                                                               |                                                |
| 1b. Title identifying a pediatric clinical trial, with an indication of the ages group(s)                                                                                                                                                                                                  | 0 = No<br>1 = Yes<br>2 = Don't know<br>6 = N/A |
|                                                                                                                                                                                                                                                                                            | <i>Evidence</i>                                |
| <i>Roles and responsibilities</i>                                                                                                                                                                                                                                                          |                                                |

|                                                                                                                                                                                                                                                                                                                             |                                                                          |
|-----------------------------------------------------------------------------------------------------------------------------------------------------------------------------------------------------------------------------------------------------------------------------------------------------------------------------|--------------------------------------------------------------------------|
| 5d3. Detail of roles and responsibilities of Data Monitoring Committees                                                                                                                                                                                                                                                     | <p>0 = No<br/>1 = Yes<br/>2 = Don't know<br/>6 = N/A</p> <p>Evidence</p> |
| <u>Introduction</u>                                                                                                                                                                                                                                                                                                         |                                                                          |
| Background and rationale                                                                                                                                                                                                                                                                                                    |                                                                          |
| 6a2. Identification or completion of a systematic review of all previous studies                                                                                                                                                                                                                                            | <p>0 = No<br/>1 = Yes<br/>2 = Don't know<br/>6 = N/A</p> <p>Evidence</p> |
| 6a3. Description of potential for extrapolation from available adult data                                                                                                                                                                                                                                                   | <p>0 = No<br/>1 = Yes<br/>2 = Don't know<br/>6 = N/A</p>                 |
| 6a4. Description of why extrapolation is not considered possible and an interventional study is considered necessary                                                                                                                                                                                                        | <p>0 = No<br/>1 = Yes<br/>2 = Don't know<br/>6 = N/A</p> <p>Evidence</p> |
| 6b2. Justification of the use of comparators in relation to the pediatric population in terms of scientific and ethical implications                                                                                                                                                                                        | <p>0 = No<br/>1 = Yes<br/>2 = Don't know<br/>6 = N/A</p> <p>Evidence</p> |
| <u>Methods</u>                                                                                                                                                                                                                                                                                                              |                                                                          |
| <i>Participants, interventions, and outcomes: study setting</i>                                                                                                                                                                                                                                                             |                                                                          |
| 9d. Description of efforts to reduce risk of participation                                                                                                                                                                                                                                                                  | <p>0 = No<br/>1 = Yes<br/>2 = Don't know<br/>6 = N/A</p> <p>Evidence</p> |
| <u>Eligibility criteria</u>                                                                                                                                                                                                                                                                                                 |                                                                          |
| 10b. Justification of the age group selected to investigate the treatment effect and explanation of the age-related differences (biological, developmental, psychological and social) in the treatment effect of an intervention                                                                                            | <p>0 = No<br/>1 = Yes<br/>2 = Don't know<br/>6 = N/A</p>                 |
| 10c. Rationale for sub-grouping of the study population in investigating the treatment effect and justify the choice of age groups/sub-grouping based on age in respect to a particular subspecialty, trial topic and/or intervention                                                                                       | <p>Evidence</p>                                                          |
| 10d. Justification for the diagnostic maneuver / biomarkers used to select pediatric patients for inclusion or exclusion                                                                                                                                                                                                    | <p>0 = No<br/>1 = Yes<br/>2 = Don't know<br/>6 = N/A</p>                 |
| 10f. Justification of all diagnostic tests or evaluations to establish eligibility                                                                                                                                                                                                                                          | <p>Evidence</p>                                                          |
| 10e. Pre-specify the baselines variables that will be assessed in each age group and if possible describe their effect on the stated primary outcome                                                                                                                                                                        | <p>0 = No<br/>1 = Yes<br/>2 = Don't know<br/>6 = N/A</p> <p>Evidence</p> |
| <u>Interventions</u>                                                                                                                                                                                                                                                                                                        |                                                                          |
| 11a2. Justification of the suitability of the chosen interventions to the pediatric population and to the pre-specified sub-groups in terms of the dose, duration, strength, route of administration, bioavailability, manipulation of adult dose for each intervention and treatment fidelity in case of behavioral trials | <p>0 = No<br/>1 = Yes<br/>2 = Don't know<br/>6 = N/A</p>                 |



|                                                                                                                                                                                                                                                                                                                                                                               |                                                |
|-------------------------------------------------------------------------------------------------------------------------------------------------------------------------------------------------------------------------------------------------------------------------------------------------------------------------------------------------------------------------------|------------------------------------------------|
|                                                                                                                                                                                                                                                                                                                                                                               | <i>Evidence</i>                                |
| 11e. Description of the appropriateness of the following processes to the pediatric population and pre-specified sub-groups: Standard criteria for intervention modification and discontinuation                                                                                                                                                                              | 0 = No<br>1 = Yes<br>2 = Don't know<br>6 = N/A |
|                                                                                                                                                                                                                                                                                                                                                                               | <i>Evidence</i>                                |
| <i>Outcomes</i>                                                                                                                                                                                                                                                                                                                                                               |                                                |
| 12b. Explanation of the relevance of the selected outcomes (benefits and harms) to the pediatric population and to the pre-specified age group(s) in terms of differences in disease definition pathogenesis, physiology, pharmacology), different clinical features and natural history, clinical practice, and roles within the contexts of families and society in general | 0 = No<br>1 = Yes<br>2 = Don't know<br>6 = N/A |
|                                                                                                                                                                                                                                                                                                                                                                               | <i>Evidence</i>                                |
| 12d. Description of measurement properties of the instruments/scales used to measure the selected outcomes, especially those related to their responsiveness to change                                                                                                                                                                                                        | 0 = No<br>1 = Yes<br>2 = Don't know<br>6 = N/A |
| 12g. Description of who is measuring each of the primary and secondary outcomes, and adverse events (e.g. child, care provider, investigator etc.)                                                                                                                                                                                                                            |                                                |
|                                                                                                                                                                                                                                                                                                                                                                               | <i>Evidence</i>                                |
| 12e. Description of potential short term harms                                                                                                                                                                                                                                                                                                                                | 0 = No<br>1 = Yes<br>2 = Don't know<br>6 = N/A |
| 12f. Description of how long term safety is addressed                                                                                                                                                                                                                                                                                                                         |                                                |
|                                                                                                                                                                                                                                                                                                                                                                               | <i>Evidence</i>                                |
| <i>Assignment of interventions (for controlled trials): Allocation</i>                                                                                                                                                                                                                                                                                                        |                                                |
| <i>Blinding (masking)</i>                                                                                                                                                                                                                                                                                                                                                     |                                                |
| 17a2. Statement indicating whether children and their care-givers will be blinded to the intervention                                                                                                                                                                                                                                                                         | 0 = No<br>1 = Yes<br>2 = Don't know<br>6 = N/A |
|                                                                                                                                                                                                                                                                                                                                                                               | <i>Evidence</i>                                |
| <i>Monitoring: Harms</i>                                                                                                                                                                                                                                                                                                                                                      |                                                |
| 22b. Explanation of the relevance of anticipated harms (adverse events/effects) to the pediatric population and to the pre-specified age group(s)                                                                                                                                                                                                                             | 0 = No<br>1 = Yes<br>2 = Don't know<br>6 = N/A |
|                                                                                                                                                                                                                                                                                                                                                                               | <i>Evidence</i>                                |
| <i>Ethics and dissemination</i>                                                                                                                                                                                                                                                                                                                                               |                                                |
| <i>Consent or assent</i>                                                                                                                                                                                                                                                                                                                                                      |                                                |
| 26a4. Justification for the use for proxy consent and indication of who will be eligible to provide it                                                                                                                                                                                                                                                                        | 0 = No<br>1 = Yes<br>2 = Don't know<br>6 = N/A |
|                                                                                                                                                                                                                                                                                                                                                                               | <i>Evidence</i>                                |
| 26b2. Indication of whether approval will be sought from local ethics committees, in case of vulnerable developing country population                                                                                                                                                                                                                                         | 0 = No<br>1 = Yes<br>2 = Don't know<br>6 = N/A |
|                                                                                                                                                                                                                                                                                                                                                                               | <i>Evidence</i>                                |
| <i>Declaration of interests</i>                                                                                                                                                                                                                                                                                                                                               |                                                |
| 28b. Financial and other competing interest for the sponsors and/or DMC members (if already identified) for the overall trial and each study site                                                                                                                                                                                                                             | 0 = No<br>1 = Yes<br>2 = Don't know<br>6 = N/A |

|                                                                                                                                                                                                                        |                                                                         |
|------------------------------------------------------------------------------------------------------------------------------------------------------------------------------------------------------------------------|-------------------------------------------------------------------------|
|                                                                                                                                                                                                                        | <i>Evidence</i>                                                         |
| <i>Ancillary and post-trial care</i>                                                                                                                                                                                   |                                                                         |
| 30b. Statement indicating plans for long-term monitoring of outcomes, considering the effect of an intervention on the pediatric population and the pre-specified age group(s) beyond the formal study completion date | 0 = No<br>1 = Yes<br>2 = Don't know<br>6 = N/A                          |
|                                                                                                                                                                                                                        | <i>Evidence</i>                                                         |
|                                                                                                                                                                                                                        |                                                                         |
| Are there any other suggestions not included in SPIRIT-C (Original + extension)?                                                                                                                                       |                                                                         |
| Do the authors recommend the use of SPIRIT?                                                                                                                                                                            | 0 = No<br>1 = Yes<br>2 = Don't know                                     |
| <u>Other</u>                                                                                                                                                                                                           |                                                                         |
| Does this paper describe trial methodology design issues that are specific to trials with children?                                                                                                                    | 0 = No<br>1 = Yes<br>2 = Don't know                                     |
| Were there any methodological design issues addressed with respect to children that (might) deviate from adults?                                                                                                       | 0 = No<br>1 = Yes<br>2 = Don't know                                     |
| If yes, list the issues                                                                                                                                                                                                | <i>Copy the specific section into a separate sheet in this workbook</i> |
| Describe how these issues may have been overcome                                                                                                                                                                       | <i>Copy the specific section into a separate sheet in this workbook</i> |
| Does this paper describe ethical issues that are specific to the design of trials with children?                                                                                                                       | 0 = No<br>1 = Yes<br>2 = Don't know                                     |
| If yes, list the issues                                                                                                                                                                                                | <i>Copy the specific section into a separate sheet in this workbook</i> |
| Describe how these issues may have been overcome                                                                                                                                                                       | <i>Copy the specific section into a separate sheet in this workbook</i> |
| Was the review of a separate paper required?                                                                                                                                                                           | 0 = No<br>1 = Yes<br>2 = Don't know                                     |
| Cite the paper:                                                                                                                                                                                                        |                                                                         |
|                                                                                                                                                                                                                        |                                                                         |
| Exclusion                                                                                                                                                                                                              | 0 = No<br>1 = Yes<br>2 = Don't know                                     |
| If so, why?                                                                                                                                                                                                            |                                                                         |
