# Supplementary material for: Recommendations and evidence for reporting items in pediatric clinical trial protocols and reports: two systematic reviews
Source: Springer Nature journal article supplement (doi:10.1186/s13063-015-0954-0), 2015-09-18
Supplement: MOESM4 [file 9782536]

## CONSORT-C data extraction form

| Item                                                                               | Description                                                                                                                                                                                                                                        |
|------------------------------------------------------------------------------------|----------------------------------------------------------------------------------------------------------------------------------------------------------------------------------------------------------------------------------------------------|
| Record ID                                                                          |                                                                                                                                                                                                                                                    |
| First Author                                                                       | <i>Last Name, First Initial (e.g. Smith, J)</i>                                                                                                                                                                                                    |
| Year                                                                               |                                                                                                                                                                                                                                                    |
| Title                                                                              |                                                                                                                                                                                                                                                    |
| Journal                                                                            | <i>Full title of journal</i>                                                                                                                                                                                                                       |
| <u>Study Information</u>                                                           |                                                                                                                                                                                                                                                    |
| Study Type                                                                         | 1 = clinical trial<br>2 = systematic review<br>3 = meta analysis<br>4 = commentary/review<br>5 = cohort/cross sectional<br>6 = protocol<br>7 = other                                                                                               |
| Country                                                                            |                                                                                                                                                                                                                                                    |
| Target Population                                                                  | 1 = adult<br>2 = paediatric<br>3 = all<br>4 = N/A                                                                                                                                                                                                  |
| Trial Design                                                                       | <i>If it's a CT</i><br>1 = RCT<br>2 = Cluster<br>3 = Other                                                                                                                                                                                         |
| Area of study                                                                      | <i>e.g. Rheumatology</i>                                                                                                                                                                                                                           |
| <u>Guideline Details</u>                                                           |                                                                                                                                                                                                                                                    |
| Does this paper describe a reporting guideline/recommendations for trials?         | 0 = No<br>1 = Yes<br>2 = Don't know<br>6 = N/A                                                                                                                                                                                                     |
| If the question above is yes: What study design are these guidelines intended for? | 1 = clinical trial<br>2 = systematic review<br>3 = meta analysis<br>4 = commentary/review<br>5 = cohort/cross sectional<br>6 = protocol<br>7 = other<br><br><i>NOTE: If there is more than one applicable, separate each number with "[space]"</i> |
| Is evidence provided to support these guidelines/suggestions?                      | 0 = No<br>1 = Yes<br>2 = Don't know<br>6 = N/A                                                                                                                                                                                                     |
| If yes, how was this evidence achieved?                                            | 1 = Literature Review<br>2 = Systematic REview<br>3 = Clinical Trial<br>4 = Consensus<br>5 = Expert opinion<br>6 = N/A                                                                                                                             |
|                                                                                    |                                                                                                                                                                                                                                                    |
|                                                                                    |                                                                                                                                                                                                                                                    |
| <u>CONSORT 2010 Evidence</u>                                                       |                                                                                                                                                                                                                                                    |
| <u>Title and Abstract</u>                                                          |                                                                                                                                                                                                                                                    |
| 1a Identification as a randomised trial in the title                               | 0 = No<br>1 = Yes<br>2 = Don't know<br>6 = N/A                                                                                                                                                                                                     |
|                                                                                    | <i>Evidence</i>                                                                                                                                                                                                                                    |

|                                                                                                                                          |                                                            |
|------------------------------------------------------------------------------------------------------------------------------------------|------------------------------------------------------------|
| 1b Structured summary of trial design, method, results, and conclusions                                                                  | 0 = No<br>1 = Yes<br>2 = Don't know<br>6 = N/A<br>Evidence |
| <u>Introduction</u>                                                                                                                      |                                                            |
| <i>Background &amp; Objectives</i>                                                                                                       |                                                            |
| 2a Scientific background and explanation of rationale                                                                                    | 0 = No<br>1 = Yes<br>2 = Don't know<br>6 = N/A<br>Evidence |
| 2b Specific objectives or hypotheses                                                                                                     | 0 = No<br>1 = Yes<br>2 = Don't know<br>6 = N/A<br>Evidence |
| <u>Methods</u>                                                                                                                           |                                                            |
| <i>Trial Design</i>                                                                                                                      |                                                            |
| 3a Description of trial design (such as parallel, factorial) including allocation ratio                                                  | 0 = No<br>1 = Yes<br>2 = Don't know<br>6 = N/A<br>Evidence |
| 3b Important changes to methods after trial commencement (such as eligibility criteria), with reasons                                    | 0 = No<br>1 = Yes<br>2 = Don't know<br>6 = N/A<br>Evidence |
| <i>Participants</i>                                                                                                                      |                                                            |
| 4a Eligibility criteria for participants                                                                                                 | 0 = No<br>1 = Yes<br>2 = Don't know<br>6 = N/A<br>Evidence |
| 4b Settings and locations where the data were collected                                                                                  | 0 = No<br>1 = Yes<br>2 = Don't know<br>6 = N/A<br>Evidence |
| <i>Interventions</i>                                                                                                                     |                                                            |
| 5 The interventions for each group with sufficient details to allow replications, including how and when they were actually administered | 0 = No<br>1 = Yes<br>2 = Don't know<br>6 = N/A<br>Evidence |
| <i>Outcomes</i>                                                                                                                          |                                                            |
| 6a Completely defined pre-specified primary and secondary outcome measures, including how and when they were assessed                    | 0 = No<br>1 = Yes<br>2 = Don't know<br>6 = N/A<br>Evidence |
| 6b Any changes to trial outcomes after the trial commenced, with reasons                                                                 | 0 = No<br>1 = Yes<br>2 = Don't know<br>6 = N/A<br>Evidence |
| <i>Sample Size</i>                                                                                                                       |                                                            |

|                                                                                                                                                                                               |                                                                          |
|-----------------------------------------------------------------------------------------------------------------------------------------------------------------------------------------------|--------------------------------------------------------------------------|
| 7a How sample size was determined                                                                                                                                                             | <p>0 = No<br/>1 = Yes<br/>2 = Don't know<br/>6 = N/A</p> <p>Evidence</p> |
| 7b When applicable, explanation of any interim analyses and stopping guidelines                                                                                                               | <p>0 = No<br/>1 = Yes<br/>2 = Don't know<br/>6 = N/A</p> <p>Evidence</p> |
| <u>Randomization</u>                                                                                                                                                                          |                                                                          |
| <i>Sequence Generation</i>                                                                                                                                                                    |                                                                          |
| 8a Method used to generate the random allocation sequence                                                                                                                                     | <p>0 = No<br/>1 = Yes<br/>2 = Don't know<br/>6 = N/A</p> <p>Evidence</p> |
| 8b Type of randomisation; details of any restriction (such as blocking and block size)                                                                                                        | <p>0 = No<br/>1 = Yes<br/>2 = Don't know<br/>6 = N/A</p> <p>Evidence</p> |
| <i>Allocation Concealment Mechanism</i>                                                                                                                                                       |                                                                          |
| 9 Mechanism used to implement the random allocation sequence (such as sequentially numbered containers), describing any steps taken to conceal the sequence until interventions were assigned | <p>0 = No<br/>1 = Yes<br/>2 = Don't know<br/>6 = N/A</p> <p>Evidence</p> |
| <i>Implementation</i>                                                                                                                                                                         |                                                                          |
| 10 Who generated the random allocation sequence who enrolled participants, and who assigned participants to interventions                                                                     | <p>0 = No<br/>1 = Yes<br/>2 = Don't know<br/>6 = N/A</p> <p>Evidence</p> |
| <i>Blinding</i>                                                                                                                                                                               |                                                                          |
| 11a If done, who was blinded after assignment to interventions (for examples, participants, care providers, those assessing outcomes) and how                                                 | <p>0 = No<br/>1 = Yes<br/>2 = Don't know<br/>6 = N/A</p> <p>Evidence</p> |
| 11b If relevant, description of the similarity of interventions                                                                                                                               | <p>0 = No<br/>1 = Yes<br/>2 = Don't know<br/>6 = N/A</p> <p>Evidence</p> |
| <i>Statistical Methods</i>                                                                                                                                                                    |                                                                          |
| 12a Statistical methods used to compare groups for primary secondary outcomes                                                                                                                 | <p>0 = No<br/>1 = Yes<br/>2 = Don't know<br/>6 = N/A</p> <p>Evidence</p> |
| 12b Methods for additional analyses, such as subgroup analyses and adjusted analyses                                                                                                          | <p>0 = No<br/>1 = Yes<br/>2 = Don't know<br/>6 = N/A</p> <p>Evidence</p> |
| <u>Results</u>                                                                                                                                                                                |                                                                          |
| <i>Participant flow</i>                                                                                                                                                                       |                                                                          |

|                                                                                                                                                       |                                                            |
|-------------------------------------------------------------------------------------------------------------------------------------------------------|------------------------------------------------------------|
| 13a For each group, the numbers of participants who were randomly assigned, received intended treatment, and were analysed for the primary outcome    | 0 = No<br>1 = Yes<br>2 = Don't know<br>6 = N/A<br>Evidence |
| 13b For each group, losses and exclusions after randomisation, together with reasons                                                                  | 0 = No<br>1 = Yes<br>2 = Don't know<br>6 = N/A<br>Evidence |
| <i>Recruitment</i>                                                                                                                                    |                                                            |
| 14a Dates defining the periods of recruitment and follow-up                                                                                           | 0 = No<br>1 = Yes<br>2 = Don't know<br>6 = N/A<br>Evidence |
| 14b Why the trial ended or was stopped                                                                                                                | 0 = No<br>1 = Yes<br>2 = Don't know<br>6 = N/A<br>Evidence |
| <i>Baseline data</i>                                                                                                                                  |                                                            |
| 15 A table showing baseline demographic and clinical characteristics for each group                                                                   | 0 = No<br>1 = Yes<br>2 = Don't know<br>6 = N/A<br>Evidence |
| <i>Numbers analysed</i>                                                                                                                               |                                                            |
| 16 For each group, number of participants (denominator) included in each analysis and whether the analysis was by original assigned groups            | 0 = No<br>1 = Yes<br>2 = Don't know<br>6 = N/A<br>Evidence |
| <i>Outcomes and Estimation</i>                                                                                                                        |                                                            |
| 17a For each primary and secondary outcome, results for each group, and the estimated effect size and its precision (Such as 95% confidence interval) | 0 = No<br>1 = Yes<br>2 = Don't know<br>6 = N/A<br>Evidence |
| 17b For binary outcomes, presentation of both absolute and relative effect sizes is recommended                                                       | 0 = No<br>1 = Yes<br>2 = Don't know<br>6 = N/A<br>Evidence |
| <i>Ancillary analyses</i>                                                                                                                             |                                                            |
| 18 Results of any other analyses performed, including subgroup analyses and adjusted analyses, distinguishing pre-specified from exploratory          | 0 = No<br>1 = Yes<br>2 = Don't know<br>6 = N/A<br>Evidence |
| <i>Harms</i>                                                                                                                                          |                                                            |
| 19 All important harms or unintended effects in each group                                                                                            | 0 = No<br>1 = Yes<br>2 = Don't know<br>6 = N/A<br>Evidence |
| <i>Discussion</i>                                                                                                                                     |                                                            |
| <i>Limitations</i>                                                                                                                                    |                                                            |

|                                                                                                                     |                                                                          |
|---------------------------------------------------------------------------------------------------------------------|--------------------------------------------------------------------------|
| 20 Trial limitations, addressing sources of potential bias, imprecision, and, if relevant, multiplicity of analyses | <p>0 = No<br/>1 = Yes<br/>2 = Don't know<br/>6 = N/A</p> <p>Evidence</p> |
| <i>Generalisability</i>                                                                                             |                                                                          |
| 21 Generalisability (external validity, applicability) of the trial findings                                        | <p>0 = No<br/>1 = Yes<br/>2 = Don't know<br/>6 = N/A</p> <p>Evidence</p> |
| <i>Interpretation</i>                                                                                               |                                                                          |
| 22 Interpretation consistent with results, balancing benefits and harms, and considering other relevant evidence    | <p>0 = No<br/>1 = Yes<br/>2 = Don't know<br/>6 = N/A</p> <p>Evidence</p> |
| <u>Other information</u>                                                                                            |                                                                          |
| <i>Registration</i>                                                                                                 |                                                                          |
| 23 Registration number and name of trial registry                                                                   | <p>0 = No<br/>1 = Yes<br/>2 = Don't know<br/>6 = N/A</p> <p>Evidence</p> |
| <i>Protocol</i>                                                                                                     |                                                                          |
| 24 Where the full trial protocol can be accessed, if available                                                      | <p>0 = No<br/>1 = Yes<br/>2 = Don't know<br/>6 = N/A</p> <p>Evidence</p> |
| <i>Funding</i>                                                                                                      |                                                                          |
| 25 Sources of funding and other support (such as supply of drugs), role of funders                                  | <p>0 = No<br/>1 = Yes<br/>2 = Don't know<br/>6 = N/A</p> <p>Evidence</p> |
| <u>CONSORT-C Evidence</u>                                                                                           |                                                                          |
| <u>Title and Abstract</u>                                                                                           |                                                                          |
| Age range of participants                                                                                           | <p>0 = No<br/>1 = Yes<br/>2 = Don't know<br/>6 = N/A</p> <p>Evidence</p> |
| Clearly describe the efficacy/effectiveness in children or state that there is a lack of evidence for these         | <p>0 = No<br/>1 = Yes<br/>2 = Don't know<br/>6 = N/A</p> <p>Evidence</p> |
| <i>Introduction</i>                                                                                                 |                                                                          |
| <i>Background &amp; Objectives</i>                                                                                  |                                                                          |
| Describe the reason to perform the clinical trial in children                                                       | <p>0 = No<br/>1 = Yes<br/>2 = Don't know<br/>6 = N/A</p> <p>Evidence</p> |

|                                                                                                                                     |                                                                          |
|-------------------------------------------------------------------------------------------------------------------------------------|--------------------------------------------------------------------------|
| Were parents and children involved in planning the trial?                                                                           | <p>0 = No<br/>1 = Yes<br/>2 = Don't know<br/>6 = N/A</p> <p>Evidence</p> |
| Report whether there is a systematic review of the intervention and whether it includes children                                    | <p>0 = No<br/>1 = Yes<br/>2 = Don't know<br/>6 = N/A</p> <p>Evidence</p> |
| For drug studies, describe what is known about the differences in pharmacokinetics and pharmacodynamics between children and adults | <p>0 = No<br/>1 = Yes<br/>2 = Don't know<br/>6 = N/A</p> <p>Evidence</p> |
| <i>Methods</i>                                                                                                                      |                                                                          |
| <i>Trial Design</i>                                                                                                                 |                                                                          |
| Report whether a Data Safety Monitoring Board (or Data Monitoring Committee) was established                                        | <p>0 = No<br/>1 = Yes<br/>2 = Don't know<br/>6 = N/A</p> <p>Evidence</p> |
| <i>Participants</i>                                                                                                                 |                                                                          |
| Specific the age range for eligible children                                                                                        | <p>0 = No<br/>1 = Yes<br/>2 = Don't know<br/>6 = N/A</p> <p>Evidence</p> |
| Rationale for the age range(s) selected for the trial                                                                               | <p>0 = No<br/>1 = Yes<br/>2 = Don't know<br/>6 = N/A</p> <p>Evidence</p> |
| <i>Intervention</i>                                                                                                                 |                                                                          |
| Dose form, strength of formulation used, bioavailability, excipients, rationale for choice, manipulation of adult dose              | <p>0 = No<br/>1 = Yes<br/>2 = Don't know<br/>6 = N/A</p> <p>Evidence</p> |
| Rationale and level of evidence for control (active comparator)                                                                     | <p>0 = No<br/>1 = Yes<br/>2 = Don't know<br/>6 = N/A</p> <p>Evidence</p> |
| How much blood was drawn for the purpose of research over the course of the study?                                                  | <p>0 = No<br/>1 = Yes<br/>2 = Don't know<br/>6 = N/A</p> <p>Evidence</p> |
| <i>Outcomes</i>                                                                                                                     |                                                                          |
| Validity of outcomes in age group(s) included                                                                                       | <p>0 = No<br/>1 = Yes<br/>2 = Don't know<br/>6 = N/A</p> <p>Evidence</p> |
| <i>Sample Size</i>                                                                                                                  |                                                                          |
| Implications of planned subgroup analyses on sample size                                                                            | <p>0 = No<br/>1 = Yes<br/>2 = Don't know<br/>6 = N/A</p> <p>Evidence</p> |

|                                                                                                                                                                   |                                                |
|-------------------------------------------------------------------------------------------------------------------------------------------------------------------|------------------------------------------------|
| <u>Randomization:</u>                                                                                                                                             |                                                |
| <i>Sequence Generation</i>                                                                                                                                        |                                                |
| Was stratified randomization considered?                                                                                                                          | 0 = No<br>1 = Yes<br>2 = Don't know<br>6 = N/A |
|                                                                                                                                                                   | Evidence                                       |
| <i>Statistical Methods</i>                                                                                                                                        |                                                |
| Was effect modification by age, sex, anthropometric status, and (if relevant to age of participants) gestation, birthweight, and breastfeeding status considered? | 0 = No<br>1 = Yes<br>2 = Don't know<br>6 = N/A |
|                                                                                                                                                                   | Evidence                                       |
| <i>Ethical Considerations</i>                                                                                                                                     |                                                |
| Was information about research provided to children and assent taken (appropriate for age)?                                                                       | 0 = No<br>1 = Yes<br>2 = Don't know<br>6 = N/A |
|                                                                                                                                                                   | Evidence                                       |
| What measures were taken to reduce pain, distress, and invasiveness of research methods?                                                                          | 0 = No<br>1 = Yes<br>2 = Don't know<br>6 = N/A |
|                                                                                                                                                                   | Evidence                                       |
| <u>Results</u>                                                                                                                                                    |                                                |
| <i>Baseline Data</i>                                                                                                                                              |                                                |
| Age distribution of children in the trial                                                                                                                         | 0 = No<br>1 = Yes<br>2 = Don't know<br>6 = N/A |
|                                                                                                                                                                   | Evidence                                       |
| Number of children in the trial by age categories (0-28 days, 1-12 months, 1-2 years, 3-5 years, 5-11 years, 12-17 years)                                         | 0 = No<br>1 = Yes<br>2 = Don't know<br>6 = N/A |
|                                                                                                                                                                   | Evidence                                       |
| Distribution by sex, nutritional status, if relevant by gestation, birthweight, breastfeeding status, pubertal stages                                             | 0 = No<br>1 = Yes<br>2 = Don't know<br>6 = N/A |
|                                                                                                                                                                   | Evidence                                       |
| <i>Harms</i>                                                                                                                                                      |                                                |
| Results of plan for a long-term adverse reactions, particularly those related to growth and development. If not, rationale for why not                            | 0 = No<br>1 = Yes<br>2 = Don't know<br>6 = N/A |
|                                                                                                                                                                   | Evidence                                       |
| <u>Discussion</u>                                                                                                                                                 |                                                |
| <i>Limitations</i>                                                                                                                                                |                                                |
| Using additional considerations                                                                                                                                   | 0 = No<br>1 = Yes<br>2 = Don't know<br>6 = N/A |
|                                                                                                                                                                   | Evidence                                       |
| Are there any other suggestions not included in CONSORT-C (Original + extension)?                                                                                 |                                                |
| <u>Other</u>                                                                                                                                                      |                                                |

|                                                                                                           |                                                                         |
|-----------------------------------------------------------------------------------------------------------|-------------------------------------------------------------------------|
| Does this paper describe trial methodology issues that are specific to trials with children?              | 0 = No<br>1 = Yes<br>2 = Don't know                                     |
| Were there any methodological issues addressed with respect to children that (might) deviate from adults? | 0 = No<br>1 = Yes<br>2 = Don't know                                     |
| If yes, list the issues                                                                                   | <i>Copy the specific section into a separate sheet in this workbook</i> |
| Describe how these issues may have been overcome                                                          | <i>Copy the specific section into a separate sheet in this workbook</i> |
| Does this paper describe ethical issues that are specific to trials with children?                        | 0 = No<br>1 = Yes<br>2 = Don't know                                     |
| If yes, list the issues                                                                                   | <i>Copy the specific section into a separate sheet in this workbook</i> |
| Describe how these issues may have been overcome                                                          | <i>Copy the specific section into a separate sheet in this workbook</i> |
| Was the review of a separate paper required?                                                              | 0 = No<br>1 = Yes<br>2 = Don't know                                     |
| Cite the paper:                                                                                           |                                                                         |
|                                                                                                           |                                                                         |
| Exclusion                                                                                                 | 0 = No<br>1 = Yes<br>2 = Don't know                                     |
| If so, why?                                                                                               |                                                                         |
