# Supplementary material for: Recommendations and evidence for reporting items in pediatric clinical trial protocols and reports: two systematic reviews
Source: Springer Nature journal article supplement (doi:10.1186/s13063-015-0954-0), 2015-09-18
Supplement: MOESM7 [file 9782536]

**Qualitative analysis: evidence from the literature organized by meaning and content, presented by descriptive themes and sorted into analytic themes.**

|                                                                                                                                                                                                                                                                                                                                                                                                                                                                                                                                                                                                                                                                                                                                                                                                                                                                                                                                                                                                                                                                                                                                                                                                                                                                                                                                                                                                                                                                                                                                                                                                                                                                                                                                                                                                                                                                                                                                                                                                                                                                                                                                                                                                                                                                                            |                                                                                                                                                                                                                                                                                                                                                                                                                                                                                                                                                                                                                                                                                                                                                                                                                                                                                                                                                                                                                                                                                                                                                                                                                                                                                                                                                                                                                                                                                                                                                                                                                                                                                                                                                                                                                                                                                                                                                                                                                                                                                                                                                 |                                                                                                                                                                                                                                                                                                                                                                                                                                                                                                                                                                                                                                                                                                                                                                                                                                                                                                                                                                                                                                                                                                                                                                                                                                                                                                                                                                                                                                                                                                                                                                                                                                                                                                                                                                                                                                                                                                                                                                                                                                                                                                                                                                |                                                                                                                                                                                                                                                                                                                                                                                                                                                                                                                                                                                                                                                                                                                                                                                                                                                                                                                                                                                                                                                                                                                                                                                                                                                                                                                                                                                                                                                                                                                                                                                                                                                                                                                                                                                                                                                                                                                                                                                                                                                                                                                                                                                                                                                              |                                                                                                                                                                                                                                                                                                                                                                                                                                                                                                                                                                                                                                                                                                                                                                                                                                                                                                                                                                                                                                                                                                                                                                                                                                                                                                                                                                                                                                                                                                                                                                                                                                                                                                                                                                                                                                                                                                                                                                                                                                                                                                                                                                                                                                                                                                                                     |                                                                                                                                                                                                                                                                                                                                                                                                                                                                                                                                                                                                                                                                                                                                                                                                                                                                                                                                                                                                                                                                                                                                                                                                                                                                                                                                                                                                                                                                                                                                                                                                                                                                                                                                                                                                                                                                                                                                                                                                                                                                                                                                                                                                                                                                                                |
|--------------------------------------------------------------------------------------------------------------------------------------------------------------------------------------------------------------------------------------------------------------------------------------------------------------------------------------------------------------------------------------------------------------------------------------------------------------------------------------------------------------------------------------------------------------------------------------------------------------------------------------------------------------------------------------------------------------------------------------------------------------------------------------------------------------------------------------------------------------------------------------------------------------------------------------------------------------------------------------------------------------------------------------------------------------------------------------------------------------------------------------------------------------------------------------------------------------------------------------------------------------------------------------------------------------------------------------------------------------------------------------------------------------------------------------------------------------------------------------------------------------------------------------------------------------------------------------------------------------------------------------------------------------------------------------------------------------------------------------------------------------------------------------------------------------------------------------------------------------------------------------------------------------------------------------------------------------------------------------------------------------------------------------------------------------------------------------------------------------------------------------------------------------------------------------------------------------------------------------------------------------------------------------------|-------------------------------------------------------------------------------------------------------------------------------------------------------------------------------------------------------------------------------------------------------------------------------------------------------------------------------------------------------------------------------------------------------------------------------------------------------------------------------------------------------------------------------------------------------------------------------------------------------------------------------------------------------------------------------------------------------------------------------------------------------------------------------------------------------------------------------------------------------------------------------------------------------------------------------------------------------------------------------------------------------------------------------------------------------------------------------------------------------------------------------------------------------------------------------------------------------------------------------------------------------------------------------------------------------------------------------------------------------------------------------------------------------------------------------------------------------------------------------------------------------------------------------------------------------------------------------------------------------------------------------------------------------------------------------------------------------------------------------------------------------------------------------------------------------------------------------------------------------------------------------------------------------------------------------------------------------------------------------------------------------------------------------------------------------------------------------------------------------------------------------------------------|----------------------------------------------------------------------------------------------------------------------------------------------------------------------------------------------------------------------------------------------------------------------------------------------------------------------------------------------------------------------------------------------------------------------------------------------------------------------------------------------------------------------------------------------------------------------------------------------------------------------------------------------------------------------------------------------------------------------------------------------------------------------------------------------------------------------------------------------------------------------------------------------------------------------------------------------------------------------------------------------------------------------------------------------------------------------------------------------------------------------------------------------------------------------------------------------------------------------------------------------------------------------------------------------------------------------------------------------------------------------------------------------------------------------------------------------------------------------------------------------------------------------------------------------------------------------------------------------------------------------------------------------------------------------------------------------------------------------------------------------------------------------------------------------------------------------------------------------------------------------------------------------------------------------------------------------------------------------------------------------------------------------------------------------------------------------------------------------------------------------------------------------------------------|--------------------------------------------------------------------------------------------------------------------------------------------------------------------------------------------------------------------------------------------------------------------------------------------------------------------------------------------------------------------------------------------------------------------------------------------------------------------------------------------------------------------------------------------------------------------------------------------------------------------------------------------------------------------------------------------------------------------------------------------------------------------------------------------------------------------------------------------------------------------------------------------------------------------------------------------------------------------------------------------------------------------------------------------------------------------------------------------------------------------------------------------------------------------------------------------------------------------------------------------------------------------------------------------------------------------------------------------------------------------------------------------------------------------------------------------------------------------------------------------------------------------------------------------------------------------------------------------------------------------------------------------------------------------------------------------------------------------------------------------------------------------------------------------------------------------------------------------------------------------------------------------------------------------------------------------------------------------------------------------------------------------------------------------------------------------------------------------------------------------------------------------------------------------------------------------------------------------------------------------------------------|-------------------------------------------------------------------------------------------------------------------------------------------------------------------------------------------------------------------------------------------------------------------------------------------------------------------------------------------------------------------------------------------------------------------------------------------------------------------------------------------------------------------------------------------------------------------------------------------------------------------------------------------------------------------------------------------------------------------------------------------------------------------------------------------------------------------------------------------------------------------------------------------------------------------------------------------------------------------------------------------------------------------------------------------------------------------------------------------------------------------------------------------------------------------------------------------------------------------------------------------------------------------------------------------------------------------------------------------------------------------------------------------------------------------------------------------------------------------------------------------------------------------------------------------------------------------------------------------------------------------------------------------------------------------------------------------------------------------------------------------------------------------------------------------------------------------------------------------------------------------------------------------------------------------------------------------------------------------------------------------------------------------------------------------------------------------------------------------------------------------------------------------------------------------------------------------------------------------------------------------------------------------------------------------------------------------------------------|------------------------------------------------------------------------------------------------------------------------------------------------------------------------------------------------------------------------------------------------------------------------------------------------------------------------------------------------------------------------------------------------------------------------------------------------------------------------------------------------------------------------------------------------------------------------------------------------------------------------------------------------------------------------------------------------------------------------------------------------------------------------------------------------------------------------------------------------------------------------------------------------------------------------------------------------------------------------------------------------------------------------------------------------------------------------------------------------------------------------------------------------------------------------------------------------------------------------------------------------------------------------------------------------------------------------------------------------------------------------------------------------------------------------------------------------------------------------------------------------------------------------------------------------------------------------------------------------------------------------------------------------------------------------------------------------------------------------------------------------------------------------------------------------------------------------------------------------------------------------------------------------------------------------------------------------------------------------------------------------------------------------------------------------------------------------------------------------------------------------------------------------------------------------------------------------------------------------------------------------------------------------------------------------|
| <p><b>External validity</b><br/>Themes of evidence were considered part of the over-arching theme of external validity if the author described that the reporting of this item allows readers to assess:</p> <ul style="list-style-type: none"> <li>•relevance of the trial to their needs</li> <li>•context of the trial</li> <li>•the applicability of the trial</li> <li>•generalizability of the trial to their population</li> <li>•scope of the eligibility criteria is reasonable (not too narrow)</li> <li>•interventions are generalizable to the real world</li> <li>•whether the interventions apply to other settings and participants / patients / ages</li> <li>•whether the results apply to other settings and participants / patients / ages</li> </ul> <p><b>Reporting bias</b><br/>Themes of evidence were considered part of the over-arching theme of reporting bias if the author described that the reporting of this item:</p> <ul style="list-style-type: none"> <li>•discourages reporting bias</li> <li>•discourages selective reporting bias</li> <li>•allows readers to assess whether all results / harms / outcomes were reported</li> <li>•allows readers to distinguish post hoc revisions</li> <li>•allows readers to identify discrepancies between protocol and report</li> <li>•allows readers to assess whether pre-specified primary outcome and main comparisons are mirrored in the report</li> <li>•allows readers to assess whether clinically important effect sizes or equivalence margins were specified a priori</li> </ul> <p><b>Internal validity</b><br/>Themes of evidence were considered part of the over-arching theme of internal validity if the author described that the reporting of this item allows readers to assess:</p> <ul style="list-style-type: none"> <li>•potential for bias through competing interests or influence</li> <li>•the appropriateness of sample size calculation, trial design, and statistical analyses</li> <li>•the risk of co-intervention bias</li> <li>•the risk of confounding bias</li> <li>•the risk of ascertainment bias</li> <li>•the risk of selection bias</li> <li>•the rationale for each assumption or component in analysis</li> <li>•whether clustering is accounted for</li> </ul> | <ul style="list-style-type: none"> <li>•the risk of predictability through non-random procedures</li> <li>•the risk of biased effect size</li> <li>•the risk of allocation concealment corruption</li> <li>•the risk of attrition bias</li> <li>•the risk of unblinding</li> <li>•the validity of data collection methods in selected age groups</li> <li>•the validity of instruments in selected age groups</li> <li>•the appropriateness of variables in adjusted analysis</li> <li>•the appropriateness of methods for handling missing data</li> <li>•the appropriateness of interim analyses</li> <li>•whether age-related differences in treatment effect, baseline, or diagnostics are accounted for</li> <li>•whether effect modification was accounted for a priori</li> <li>•whether interactions were accounted for</li> <li>•whether appropriate measures were used to contain bias, imprecision, or prevent spurious findings</li> </ul> <p><b>Accountability</b><br/>Themes of evidence were considered part of the over-arching theme of accountability if the author described that the reporting of this item:</p> <ul style="list-style-type: none"> <li>•allows readers to assess who is accountable for which aspects of the trial</li> <li>•allows recognition for all contributions to the trial</li> <li>•reduces ghost authorship</li> <li>•allows readers to assess the appropriateness of those selected for their roles</li> <li>•allows readers to assess the expertise of those selected</li> <li>•allows readers to assess the mandate of those selected</li> <li>•allows readers to assess whether a statistician was included</li> <li>•clarifies the roles and responsibilities of all involved</li> <li>•allows readers to assess whether researchers are fulfilling their responsibilities to participants / parents / children</li> <li>•allows readers to assess the appropriateness of the people involved in interim analyses and stopping guidelines</li> <li>•allows readers to assess whether researchers are reachable</li> </ul> <p><b>Transparency</b><br/>Themes of evidence were considered</p> | <p>part of the over-arching theme of transparency if the author described that the reporting of this item allows readers to assess:</p> <ul style="list-style-type: none"> <li>•oversight and review</li> <li>•potential competing interests</li> <li>•transparency</li> <li>•the motivation for the trial</li> <li>•the independence of the data monitoring committee</li> <li>•the independence of researchers from sponsors</li> <li>the independence of the adverse event monitoring, reporting and management procedures</li> <li>•whether all relevant parties are independent</li> <li>•the appropriateness of the role of the sponsors</li> <li>•possible conflicts of interest</li> <li>•the independence of the quality and safety assurance procedures</li> </ul> <p><b>Usefulness</b><br/>Themes of evidence were considered part of the over-arching theme of usefulness if the author described that the reporting of this item:</p> <ul style="list-style-type: none"> <li>•ensures the publication is searchable and findable</li> <li>•makes the information consistent with other publications</li> <li>•ensures the information is useful</li> <li>•structures the publication consistently with other publications</li> <li>•reduces research waste</li> <li>•prevents duplication of research</li> <li>•allows gaps in knowledge to be identified</li> <li>•allows researchers to synthesize the information in meta-analyses and systematic reviews</li> <li>•allows reader to assess whether a core outcome set was used</li> <li>•ensures the research is being built upon previous research</li> <li>•ensures the research is consistent with previous research</li> <li>•allows readers to compare the results to those of other studies</li> <li>•allows readers to assess the risk of limited access preventing the trial from independent validation</li> <li>•allows readers to assess whether the research will be wasted through futility</li> <li>•allows readers to assess the ability of others to verify the validity of the trial results</li> <li>•makes the age subgroups consistent with other publications</li> </ul> | <p><b>Reproducibility</b><br/>Themes of evidence were considered part of the over-arching theme of reproducibility if the author described that the reporting of this item allows readers to:</p> <ul style="list-style-type: none"> <li>•understand exactly what was done for “standard care” or “usual care”</li> <li>•assess whether it would be feasible to reproduce the trial or intervention</li> <li>•objectively reproduce all aspects of the intervention</li> <li>•fully reproduce all aspects of the trial and analysis</li> <li>•assess the risk of ambiguity</li> <li>•understand what is meant by per-protocol or intention-to-treat</li> </ul> <p><b>Interpretability</b><br/>Themes of evidence were considered part of the over-arching theme of interpretability if the author described that the reporting of this item:</p> <ul style="list-style-type: none"> <li>•enables reader to make balanced assessments of the results</li> <li>•aids the proper interpretation of the results</li> <li>•enables reader to interpret methods</li> <li>•ensures the publication is understandable</li> <li>•allows readers to assess the risk in context of the disease itself</li> <li>•allows readers to assess the confidence of the results</li> <li>•allows readers to understand the limits upon the results</li> <li>•enables readers to evaluate which procedure is safest</li> <li>•enables readers to evaluate which procedure is best</li> <li>•allows readers to properly interpret the age specific context of the results</li> <li>•enables readers to evaluate the clinical importance of the results</li> <li>•allows readers to interpret whether the groups truly differ</li> </ul> <p><b>Research ethics</b><br/>Themes of evidence were considered part of the over-arching theme of ethics if the author described that the reporting of this item:</p> <ul style="list-style-type: none"> <li>•allows funders and ethics boards to assess the ethical justification</li> <li>•discourages unnecessary research</li> <li>•ensures the inclusion of children is justified</li> <li>•allows the assessment of the ethical appropriateness of the comparators</li> <li>•allows the ethical oversight to be assessed</li> </ul> | <ul style="list-style-type: none"> <li>•allows external review of participant burden</li> <li>•ensures the minimal number of participants included to meet objectives</li> <li>•allows readers to assess the appropriateness of the procedures to protect the safety of the participants</li> <li>•allows readers to assess adherence to regulations and policies</li> <li>•ensures the protection of children’s health information</li> <li>•allows readers to assess whether equipoise will be met throughout the trial &amp; stopped when violated</li> <li>•ensures that ethical approval is sought</li> <li>•allows readers to assess whether informed consent and assent procedures were appropriate</li> <li>•allows readers to assess whether proxy consent was appropriate</li> <li>•allows readers to assess whether the changing consent ability</li> <li>•allows readers to assess whether the process to protect confidentiality of personal information from outsiders is appropriate</li> <li>•allows readers to assess whether confidentiality of children from parents is appropriately considered</li> <li>•allows readers to assess whether compensation plans are appropriate</li> <li>•allows readers to assess whether interventions are available to participants following the study</li> <li>•allows readers to assess whether the extrapolation from existing data was considered and used</li> <li>•allows readers to assess whether the question could be answered using existing data</li> <li>•allows readers to assess whether risks were minimized</li> <li>•allows readers to assess whether follow-up was sufficient to capture developmental and long-term harms</li> <li>•allows readers to assess whether patient autonomy was assured</li> <li>•ensures there is sufficient evidence for the efficacy of the intervention in the selected population to justify the risk</li> </ul> <p><b>Publication bias</b><br/>Themes of evidence were considered part of the over-arching theme of publication bias if the author described that the reporting of this item:</p> <ul style="list-style-type: none"> <li>•aids literature searches</li> <li>•makes the document more easily found or linked</li> <li>•allows readers to assess whether the study is likely to have publication</li> </ul> | <p>restrictions or delays</p> <ul style="list-style-type: none"> <li>•allows readers to make health care decisions if they do not have access to full-text</li> <li>•allows readers to assess the risk of publication bias</li> <li>•allows readers to assess whether the publication will be available to the public</li> </ul> <p><b>Scientific soundness</b><br/>Themes of evidence were considered part of the overall theme of scientific soundness if the author described that the reporting of this item allows the reader to assess:</p> <ul style="list-style-type: none"> <li>•the expertise of those responsible</li> <li>•the scientific appropriateness of the comparators</li> <li>•the purpose of the trial</li> <li>•the scientific soundness of sample size calculation, trial design, and statistical analyses</li> <li>•the sample size calculations for the primary outcome</li> <li>•possible multiplicity</li> <li>•factors used for stratification, blocking, or minimisation for scientific relevance</li> <li>•adequacy of the allocation mechanism</li> <li>•scientific soundness of data collection methods</li> <li>•scientific soundness of measurement instruments</li> <li>•processes to enhance data quality</li> <li>•the risk of false positives</li> <li>•the appropriateness of the statistical methods, effect measure, significance level, and presentation</li> <li>•the scientific soundness of criteria to select variables for adjustment</li> <li>•the robustness of the assumptions made for missing data (sensitivity analysis)</li> <li>•the scientific soundness of the scientific justification for the trial</li> <li>•the scientific soundness of extrapolation from existing data</li> <li>•the justification of the age group used</li> <li>•the rationale for sub-groups</li> <li>•what is known about pediatric pharmacokinetics</li> <li>•the scientific soundness of intervention dose/duration/strength/route of administration</li> <li>•whether the rationale matches the methods</li> <li>•the scientific soundness of the selected margin for non-inferiority or equivalence</li> <li>•the scientific justification for the clinically relevant effect size</li> <li>•whether the evidence for efficacy is conclusive</li> </ul> |
|--------------------------------------------------------------------------------------------------------------------------------------------------------------------------------------------------------------------------------------------------------------------------------------------------------------------------------------------------------------------------------------------------------------------------------------------------------------------------------------------------------------------------------------------------------------------------------------------------------------------------------------------------------------------------------------------------------------------------------------------------------------------------------------------------------------------------------------------------------------------------------------------------------------------------------------------------------------------------------------------------------------------------------------------------------------------------------------------------------------------------------------------------------------------------------------------------------------------------------------------------------------------------------------------------------------------------------------------------------------------------------------------------------------------------------------------------------------------------------------------------------------------------------------------------------------------------------------------------------------------------------------------------------------------------------------------------------------------------------------------------------------------------------------------------------------------------------------------------------------------------------------------------------------------------------------------------------------------------------------------------------------------------------------------------------------------------------------------------------------------------------------------------------------------------------------------------------------------------------------------------------------------------------------------|-------------------------------------------------------------------------------------------------------------------------------------------------------------------------------------------------------------------------------------------------------------------------------------------------------------------------------------------------------------------------------------------------------------------------------------------------------------------------------------------------------------------------------------------------------------------------------------------------------------------------------------------------------------------------------------------------------------------------------------------------------------------------------------------------------------------------------------------------------------------------------------------------------------------------------------------------------------------------------------------------------------------------------------------------------------------------------------------------------------------------------------------------------------------------------------------------------------------------------------------------------------------------------------------------------------------------------------------------------------------------------------------------------------------------------------------------------------------------------------------------------------------------------------------------------------------------------------------------------------------------------------------------------------------------------------------------------------------------------------------------------------------------------------------------------------------------------------------------------------------------------------------------------------------------------------------------------------------------------------------------------------------------------------------------------------------------------------------------------------------------------------------------|----------------------------------------------------------------------------------------------------------------------------------------------------------------------------------------------------------------------------------------------------------------------------------------------------------------------------------------------------------------------------------------------------------------------------------------------------------------------------------------------------------------------------------------------------------------------------------------------------------------------------------------------------------------------------------------------------------------------------------------------------------------------------------------------------------------------------------------------------------------------------------------------------------------------------------------------------------------------------------------------------------------------------------------------------------------------------------------------------------------------------------------------------------------------------------------------------------------------------------------------------------------------------------------------------------------------------------------------------------------------------------------------------------------------------------------------------------------------------------------------------------------------------------------------------------------------------------------------------------------------------------------------------------------------------------------------------------------------------------------------------------------------------------------------------------------------------------------------------------------------------------------------------------------------------------------------------------------------------------------------------------------------------------------------------------------------------------------------------------------------------------------------------------------|--------------------------------------------------------------------------------------------------------------------------------------------------------------------------------------------------------------------------------------------------------------------------------------------------------------------------------------------------------------------------------------------------------------------------------------------------------------------------------------------------------------------------------------------------------------------------------------------------------------------------------------------------------------------------------------------------------------------------------------------------------------------------------------------------------------------------------------------------------------------------------------------------------------------------------------------------------------------------------------------------------------------------------------------------------------------------------------------------------------------------------------------------------------------------------------------------------------------------------------------------------------------------------------------------------------------------------------------------------------------------------------------------------------------------------------------------------------------------------------------------------------------------------------------------------------------------------------------------------------------------------------------------------------------------------------------------------------------------------------------------------------------------------------------------------------------------------------------------------------------------------------------------------------------------------------------------------------------------------------------------------------------------------------------------------------------------------------------------------------------------------------------------------------------------------------------------------------------------------------------------------------|-------------------------------------------------------------------------------------------------------------------------------------------------------------------------------------------------------------------------------------------------------------------------------------------------------------------------------------------------------------------------------------------------------------------------------------------------------------------------------------------------------------------------------------------------------------------------------------------------------------------------------------------------------------------------------------------------------------------------------------------------------------------------------------------------------------------------------------------------------------------------------------------------------------------------------------------------------------------------------------------------------------------------------------------------------------------------------------------------------------------------------------------------------------------------------------------------------------------------------------------------------------------------------------------------------------------------------------------------------------------------------------------------------------------------------------------------------------------------------------------------------------------------------------------------------------------------------------------------------------------------------------------------------------------------------------------------------------------------------------------------------------------------------------------------------------------------------------------------------------------------------------------------------------------------------------------------------------------------------------------------------------------------------------------------------------------------------------------------------------------------------------------------------------------------------------------------------------------------------------------------------------------------------------------------------------------------------------|------------------------------------------------------------------------------------------------------------------------------------------------------------------------------------------------------------------------------------------------------------------------------------------------------------------------------------------------------------------------------------------------------------------------------------------------------------------------------------------------------------------------------------------------------------------------------------------------------------------------------------------------------------------------------------------------------------------------------------------------------------------------------------------------------------------------------------------------------------------------------------------------------------------------------------------------------------------------------------------------------------------------------------------------------------------------------------------------------------------------------------------------------------------------------------------------------------------------------------------------------------------------------------------------------------------------------------------------------------------------------------------------------------------------------------------------------------------------------------------------------------------------------------------------------------------------------------------------------------------------------------------------------------------------------------------------------------------------------------------------------------------------------------------------------------------------------------------------------------------------------------------------------------------------------------------------------------------------------------------------------------------------------------------------------------------------------------------------------------------------------------------------------------------------------------------------------------------------------------------------------------------------------------------------|
